# Supplementary material for: Adverse Childhood Experiences: Implications for Offspring Telomere Length and Psychopathology
Source: Atypon-hosted journal article supplement (doi:10.1176/appi.ajp.2019.18030335), 2019-09-06
Supplement: appi.ajp.2019.18030335.ds001.pdf [file appi.ajp.2019.18030335.ds001.pdf]

**Table S1. Correlation matrix of study outcomes and relevant covariates**

|                                      | Cumulative ACE | 4-month TL | 12-month TL | 18-month TL | EXT      | INT    | Sex   | Race     | Maternal age | Gestational age | SES       | Maternal postnatal depression | PNMS  |
|--------------------------------------|----------------|------------|-------------|-------------|----------|--------|-------|----------|--------------|-----------------|-----------|-------------------------------|-------|
| <b>Cumulative ACE</b>                | 1              |            |             |             |          |        |       |          |              |                 |           |                               |       |
| <b>4-month TL</b>                    | -0.15          | 1          |             |             |          |        |       |          |              |                 |           |                               |       |
| <b>12-month TL</b>                   | -0.14          | 0.21*      | 1           |             |          |        |       |          |              |                 |           |                               |       |
| <b>18-month TL</b>                   | -0.08          | 0.23**     | 0.23*       | 1           |          |        |       |          |              |                 |           |                               |       |
| <b>EXT</b>                           | 0.23**         | -0.09      | -0.01       | -0.05       | 1        |        |       |          |              |                 |           |                               |       |
| <b>INT</b>                           | 0.16           | -0.06      | 0.15        | -0.00       | 0.63**** | 1      |       |          |              |                 |           |                               |       |
| <b>Sex</b>                           | 0.07           | -0.05      | -0.06       | 0.00        | -0.06    | 0.11   | 1     |          |              |                 |           |                               |       |
| <b>Race</b>                          | 0.07           | 0.04       | -0.24**     | -0.08       | 0.03     | -0.12  | -0.00 | 1        |              |                 |           |                               |       |
| <b>Maternal age</b>                  | -0.16          | 0.10       | -0.12       | -0.04       | -0.06    | -0.10  | 0.08  | 0.35**** | 1            |                 |           |                               |       |
| <b>Gestational age</b>               | 0.09           | -0.09      | -0.04       | 0.03        | -0.08    | -0.01  | 0.03  | 0.13     | -0.00        | 1               |           |                               |       |
| <b>SES</b>                           | -0.30***       | 0.03       | -0.13       | 0.14        | -0.03    | -0.22* | 0.01  | 0.41**** | 0.29***      | 0.14            | 1         |                               |       |
| <b>Maternal postnatal depression</b> | 0.20*          | 0.03       | 0.08        | -0.01       | 0.19*    | 0.26** | -0.01 | -0.15    | -0.11        | -0.04           | -0.30***  | 1                             |       |
| <b>PNMS</b>                          | 0.39****       | -0.02      | 0.11        | -0.11       | 0.10     | 0.14   | 0.04  | -0.09    | -0.14        | 0.08            | -0.34**** | 0.41****                      | 1     |
| <b>Pregnancy complications</b>       | 0.09           | -0.09      | -0.06       | -0.05       | 0.00     | 0.00   | 0.02  | -0.17*   | -0.13        | -0.33****       | -0.05     | 0.04                          | -0.04 |

\* <0.05; \*\* <0.01; \*\*\* <0.001; \*\*\*\* <0.0001

**Table S2. The magnitude of TL attrition as a moderator of maternal ACEs on infant EXT**

|                            | EXT                                     |                   |
|----------------------------|-----------------------------------------|-------------------|
|                            | Moderation by quartiles of TL attrition |                   |
| Sample size                | 136                                     |                   |
|                            | $\beta$                                 | P-value           |
| <b>Intercept</b>           | <b>48.695</b>                           | <b>&lt;0.0001</b> |
| <b>ACE score</b>           | 0.179                                   | 0.84              |
| <b>TL attrition</b>        |                                         |                   |
| <b>2nd quartile</b>        | -0.951                                  | 0.81              |
| <b>3rd quartile</b>        | -4.560                                  | 0.23              |
| <b>4th quartile</b>        | -6.832                                  | 0.080             |
| <b>1st quartile</b>        | Ref                                     | Ref               |
| <b>ACE x TL attrition</b>  |                                         |                   |
| <b>ACE x 2nd quartile</b>  | 1.485                                   | 0.25              |
| <b>ACE x 3rd quartile</b>  | 1.215                                   | 0.27              |
| <b>ACE x 4th quartile</b>  | <b>2.902</b>                            | <b>0.018</b>      |
| <b>ACE x 1st quartile</b>  | Ref                                     | Ref               |
| <b>PNMS score</b>          | -0.564                                  | 0.47              |
| <b>Sex</b>                 | -1.470                                  | 0.41              |
| <b>Race</b>                | -0.188                                  | 0.90              |
| <b>SES</b>                 | 0.422                                   | 0.43              |
| <b>Maternal depression</b> | <b>5.702</b>                            | <b>0.032</b>      |
